# Supplementary material
Source: publisher figshare collection journal article supplement (https://acs.figshare.com/ndownloader/files/5472038)
Supplement: Supplementary file 1 [file 5472038]

**Supplemental Information for:**

**Evidence for Cation Controlled Excited State Localization in a Ruthenium Polypyridyl Compound**

Evan E. Beauvilliers and Gerald J. Meyer\*

Department of Chemistry, University of North Carolina at Chapel Hill, Chapel Hill, NC 27599-3290, United States

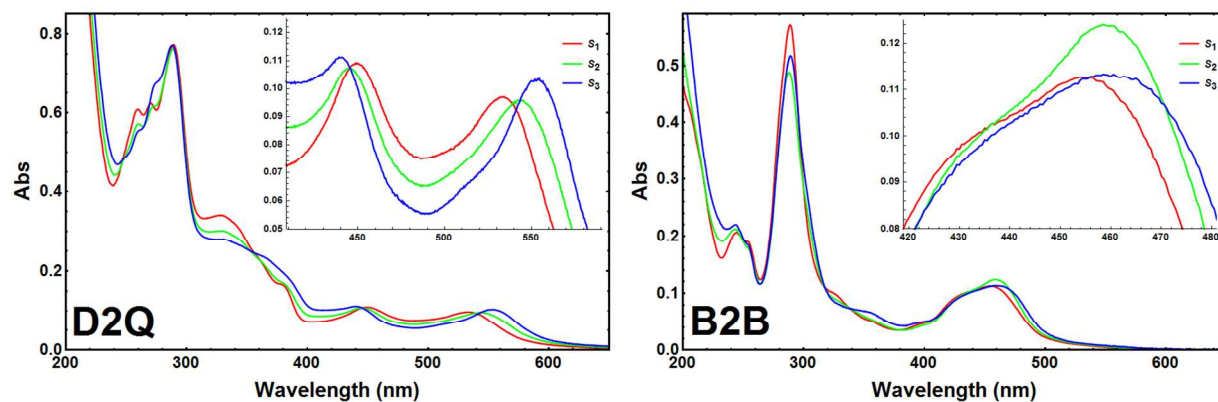

**Figure S1.** The UV-vis absorbance spectra utilized in the spectral modelling of the titration data in Figures 3 & 4.

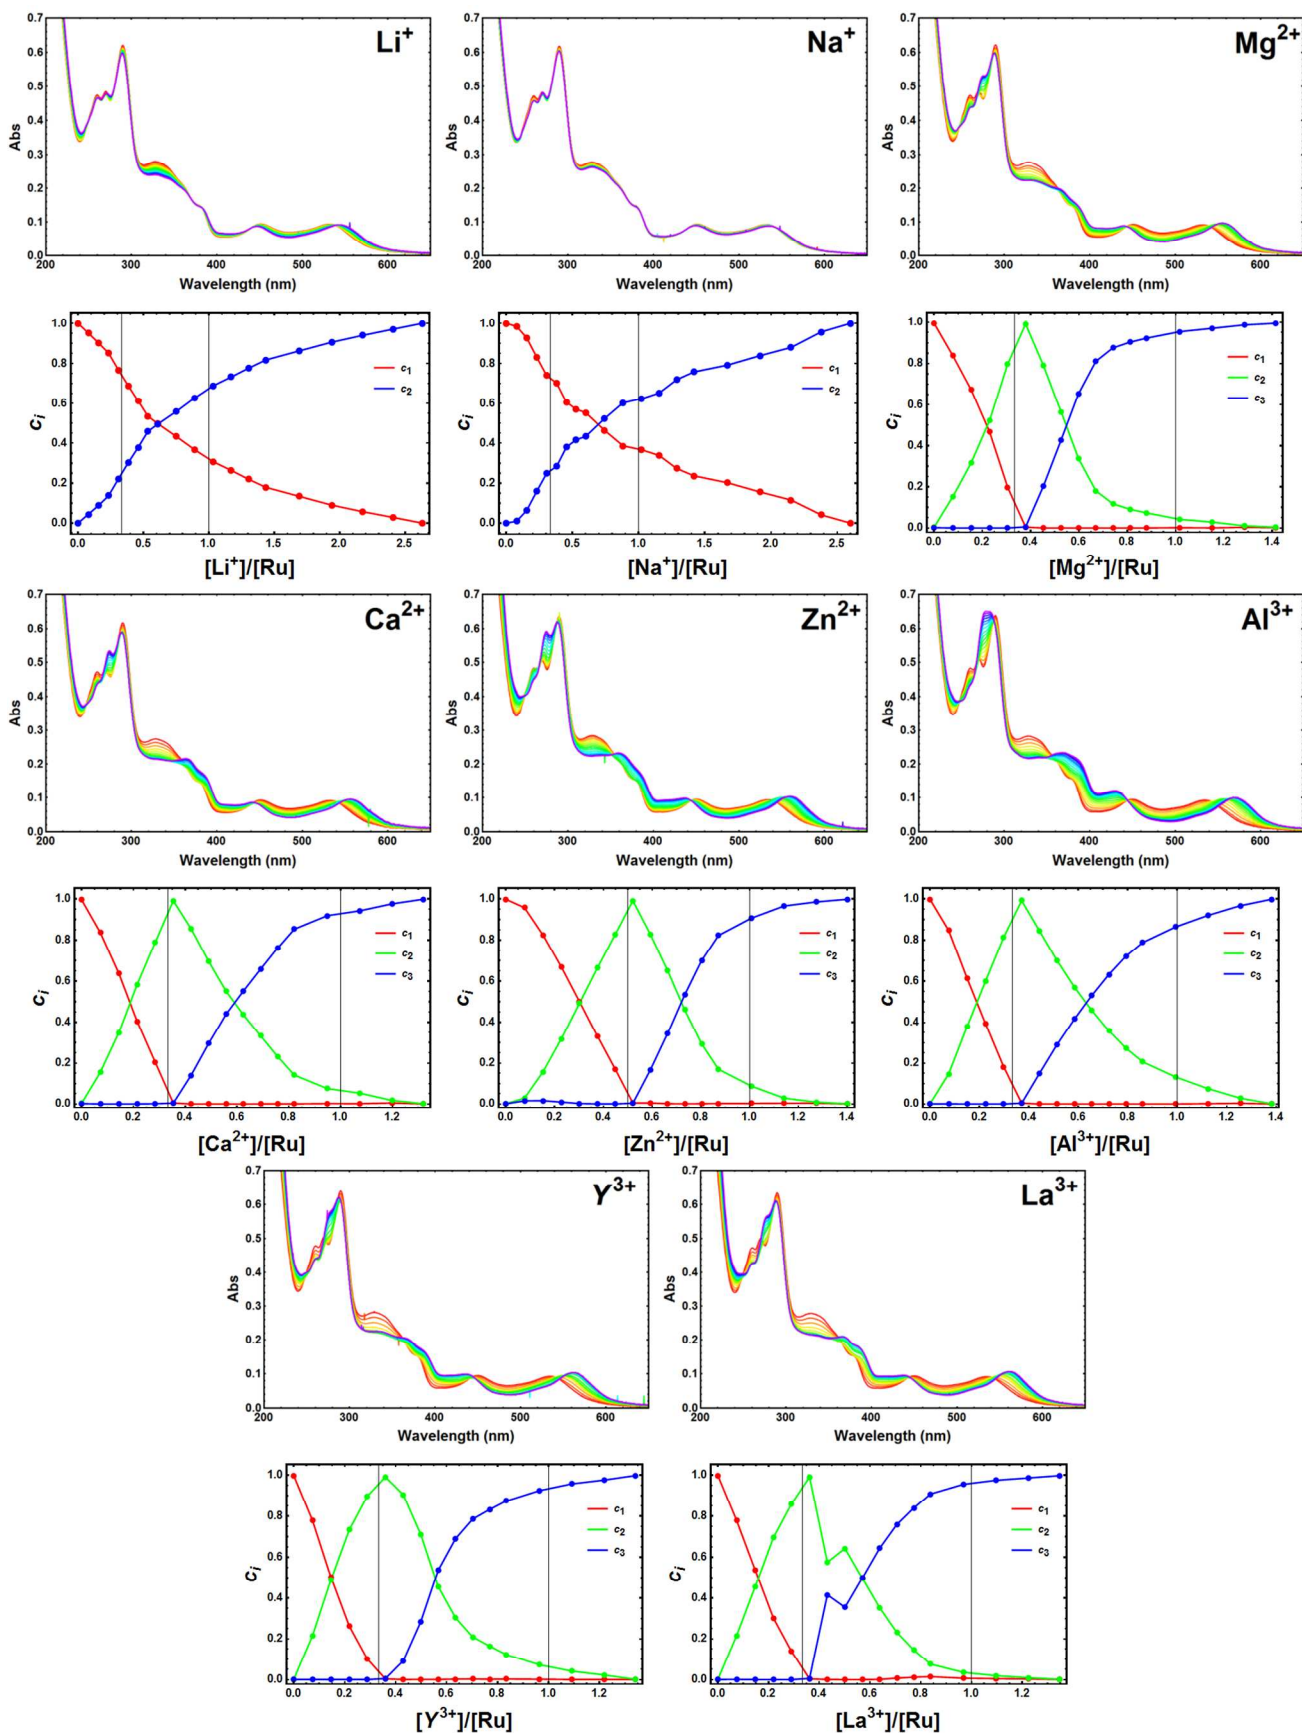

**Figure S2.** The UV-vis absorbance spectra of **D2Q** in  $CH_3CN$  with the addition of the indicated cation solution and the fractional concentrations of the species,  $c_1$ ,  $c_2$  and  $c_3$  plotted against the total  $M^{n+}$  concentration. The UV-vis spectra go from red in neat  $CH_3CN$  to purple at the highest concentration of cation. The vertical lines in the spectral modelling show where the  $[D2Q]/[M^{n+}]$  ratio is 3:1 and 1:1 (2:1 and 1:1 for  $Zn^{2+}$ ).

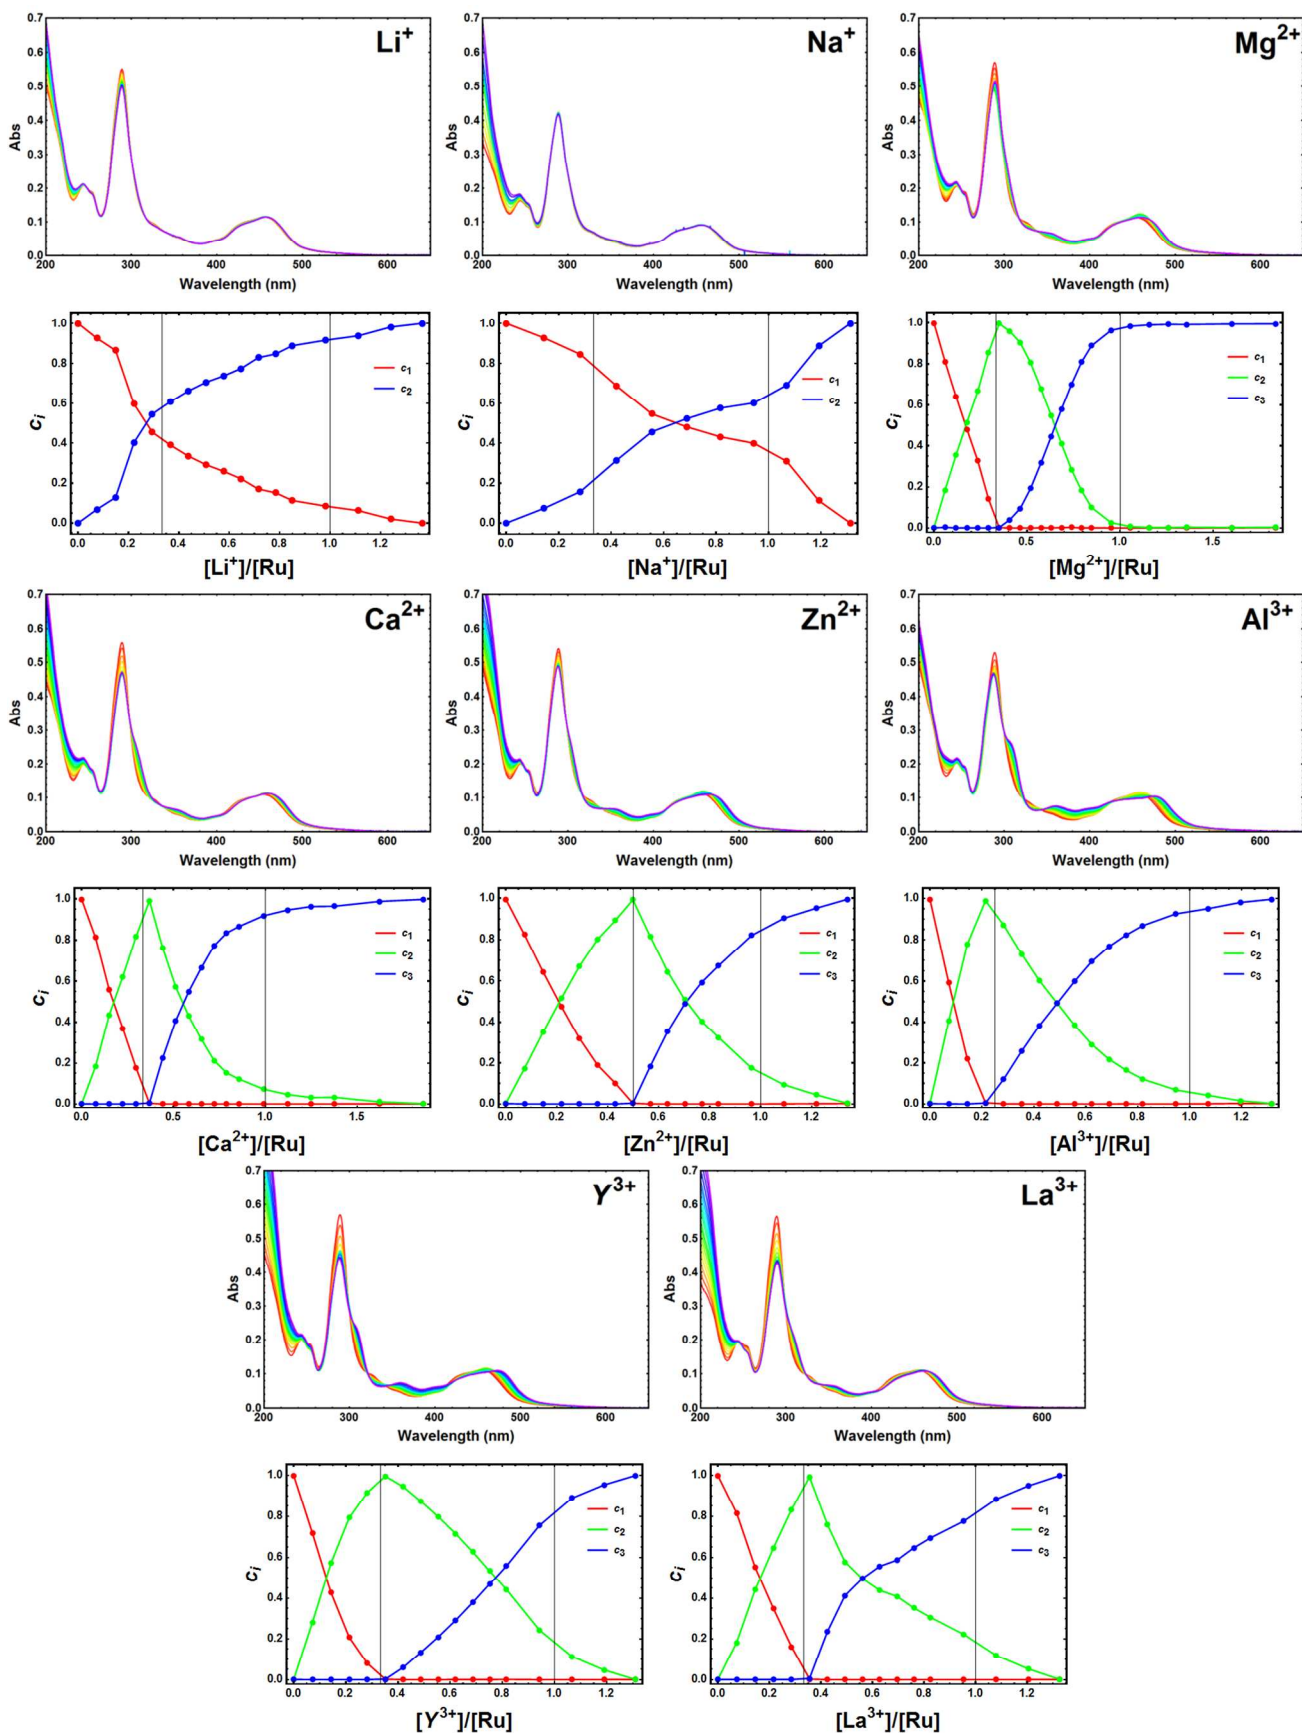

**Figure S3.** The UV-vis absorbance spectra of **B2B** in  $\text{CH}_3\text{CN}$  with the addition of the indicated cation solution and the fractional concentrations of the species,  $c_1$ ,  $c_2$  and  $c_3$  plotted against the total  $\text{M}^{n+}$  concentration. The UV-vis spectra go from red in neat  $\text{CH}_3\text{CN}$  to purple at the highest concentration of cation. The vertical lines in the spectral modelling show where the  $[\text{B2B}]/[\text{M}^{n+}]$  ratio is 3:1 and 1:1 (2:1 and 1:1 for  $\text{Zn}^{2+}$ ; 4:1 and 1:1 for  $\text{Al}^{3+}$ ).

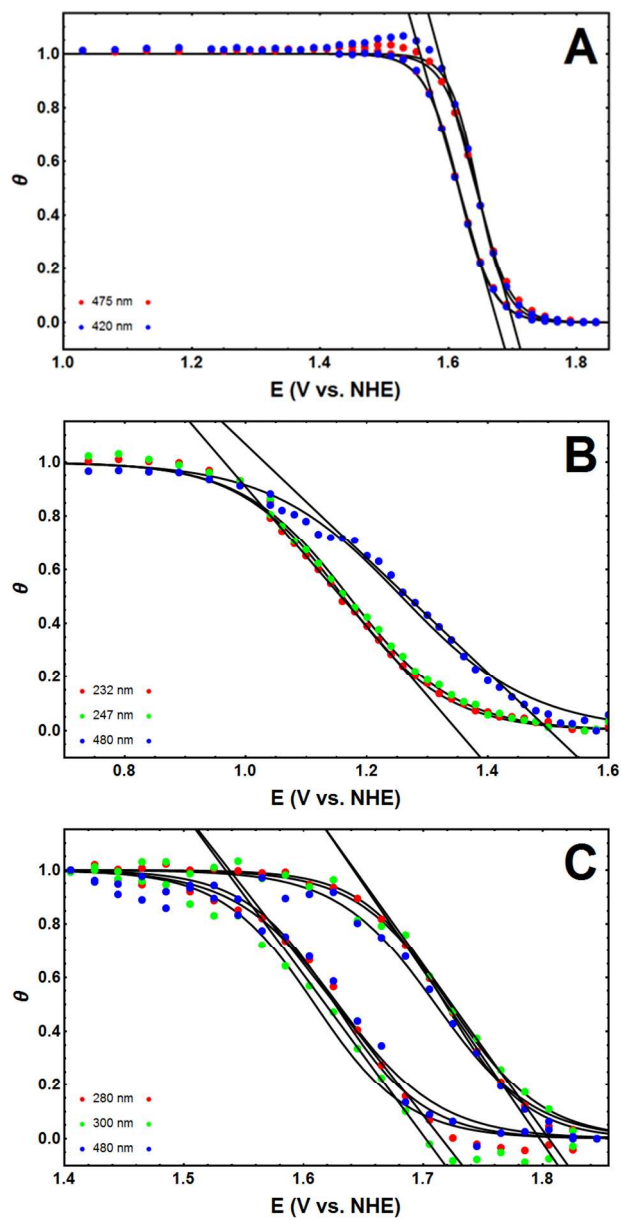

**Figure S4.** Spectroelectrochemistry of **B2B** in A) 100 mM  $\text{Mg}(\text{ClO}_4)_2$ , B) 1 mM  $\text{TBA}(\text{ClO}_4)$ , and C) 1 mM  $\text{Mg}(\text{ClO}_4)_2$  plotted as the normalized change in absorbance,  $\theta$ , at the indicated wavelength vs. the applied potential. These data are overlayed with the fits to the linear portions used to determine  $E_{1/2}$  values as well as fits to a sigmoidal curve. The  $E_{1/2}$  values from the linear fits are  $1.63 \pm 0.02$ ,  $1.20 \pm 0.08$ , and  $1.67 \pm 0.06$  V vs. NHE, respectively.

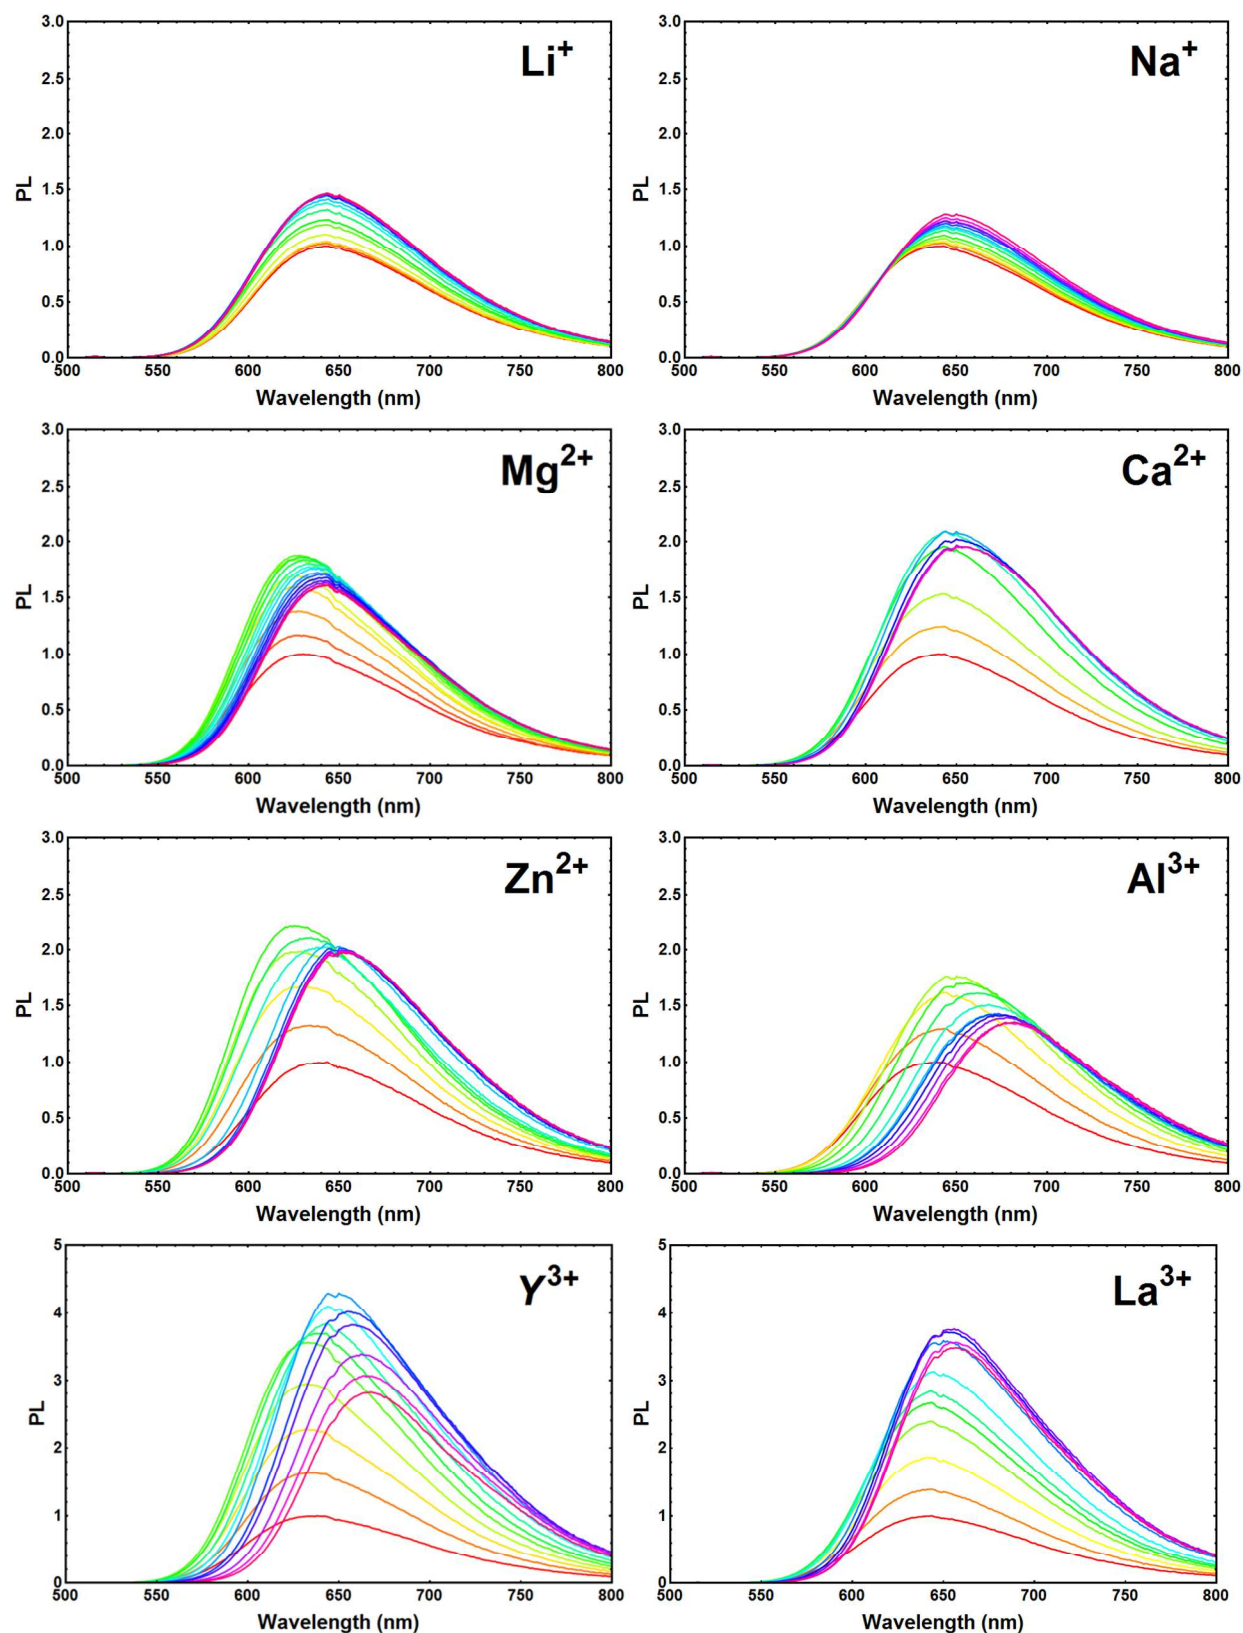

**Figure S5.** PL spectra of **B2B** in  $\text{CH}_3\text{CN}$  with the addition of the indicated cation solution. The spectra are normalized such that the PL maximum in neat  $\text{CH}_3\text{CN}$  is 1. The spectra go from red in neat  $\text{CH}_3\text{CN}$  to purple at the highest concentration of cation.
